# Supplementary material for: The Genetic Basis of Haploid Induction in Maize Identified with a Novel Genome-Wide Association Method
Source: Oxford University Press journal article supplement (doi:10.1534/genetics.115.184234), 2016-02-19
Supplement: figures2.pdf [file figures2.pdf]

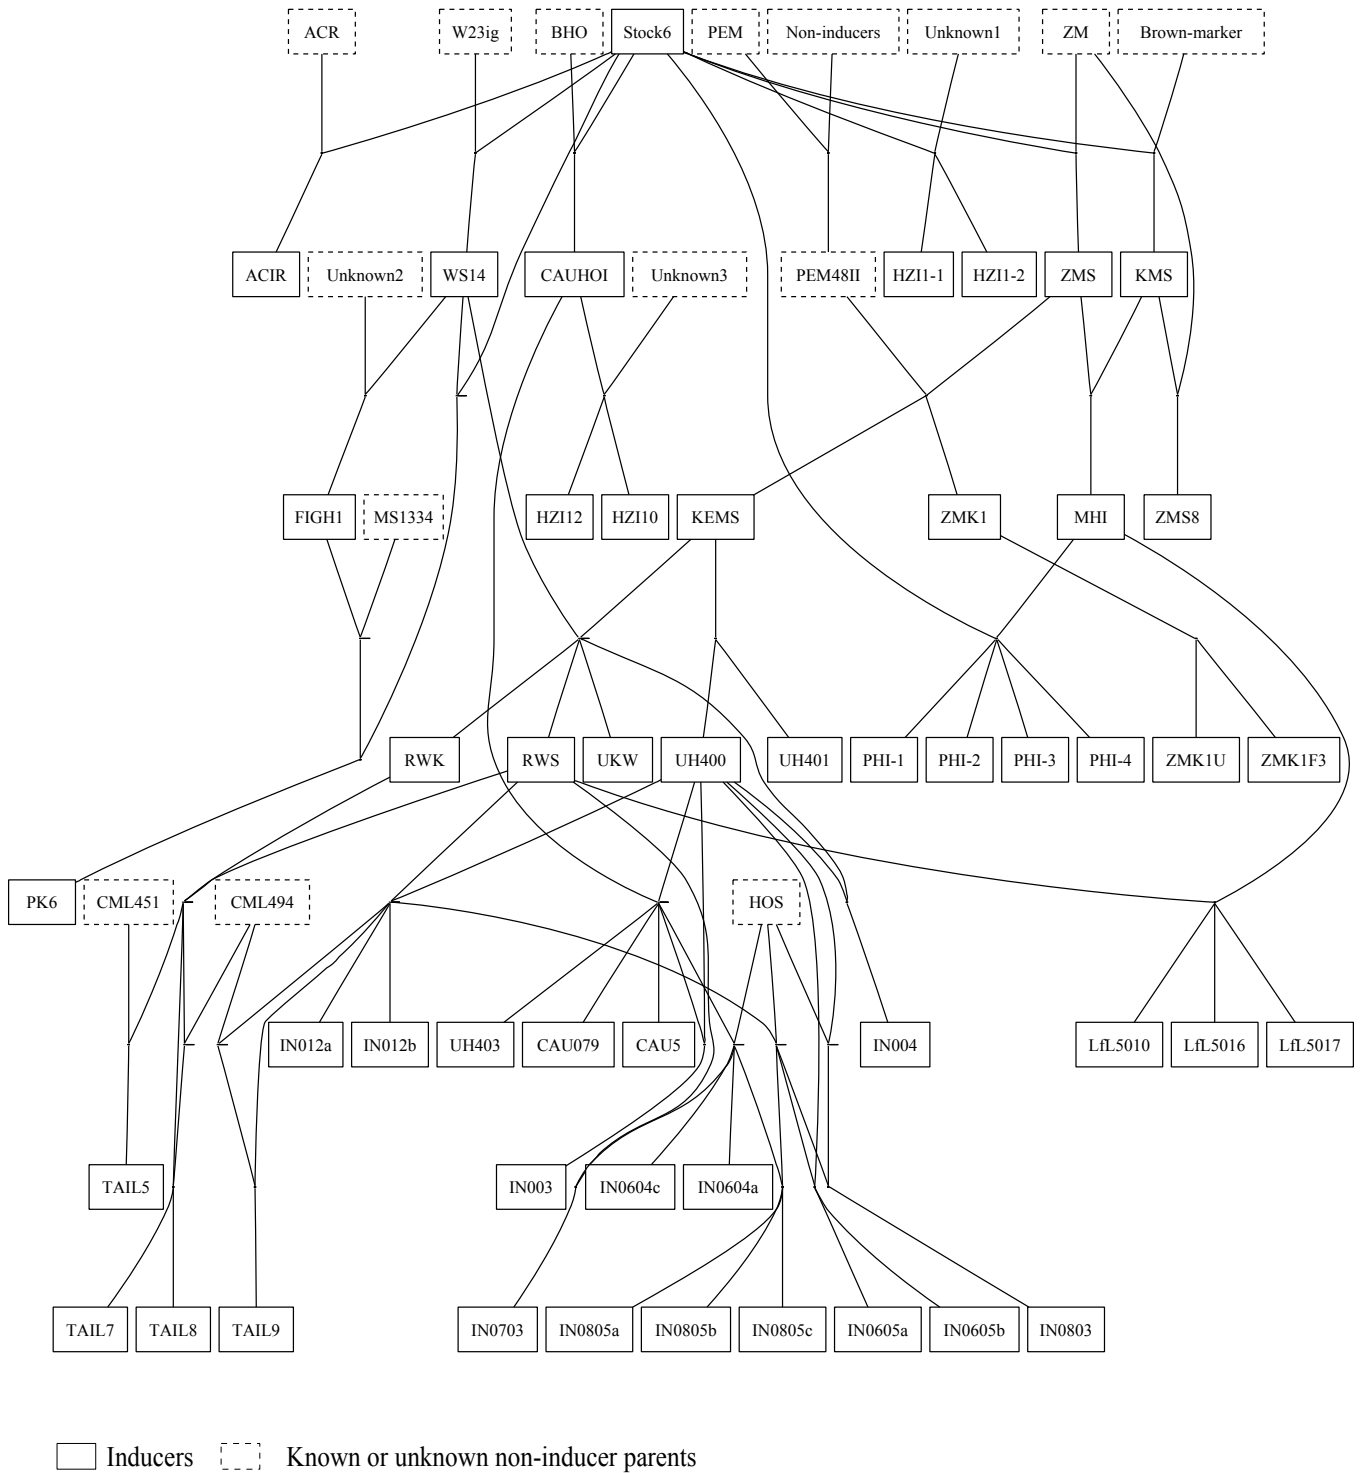

**Figure S2** Pedigree of the worldwide collection of maize haploid inducers analyzed in this study.
