# Supplementary material for: The Genetic Basis of Haploid Induction in Maize Identified with a Novel Genome-Wide Association Method
Source: Oxford University Press journal article supplement (doi:10.1534/genetics.115.184234), 2016-02-19
Supplement: figures3.pdf [file figures3.pdf]

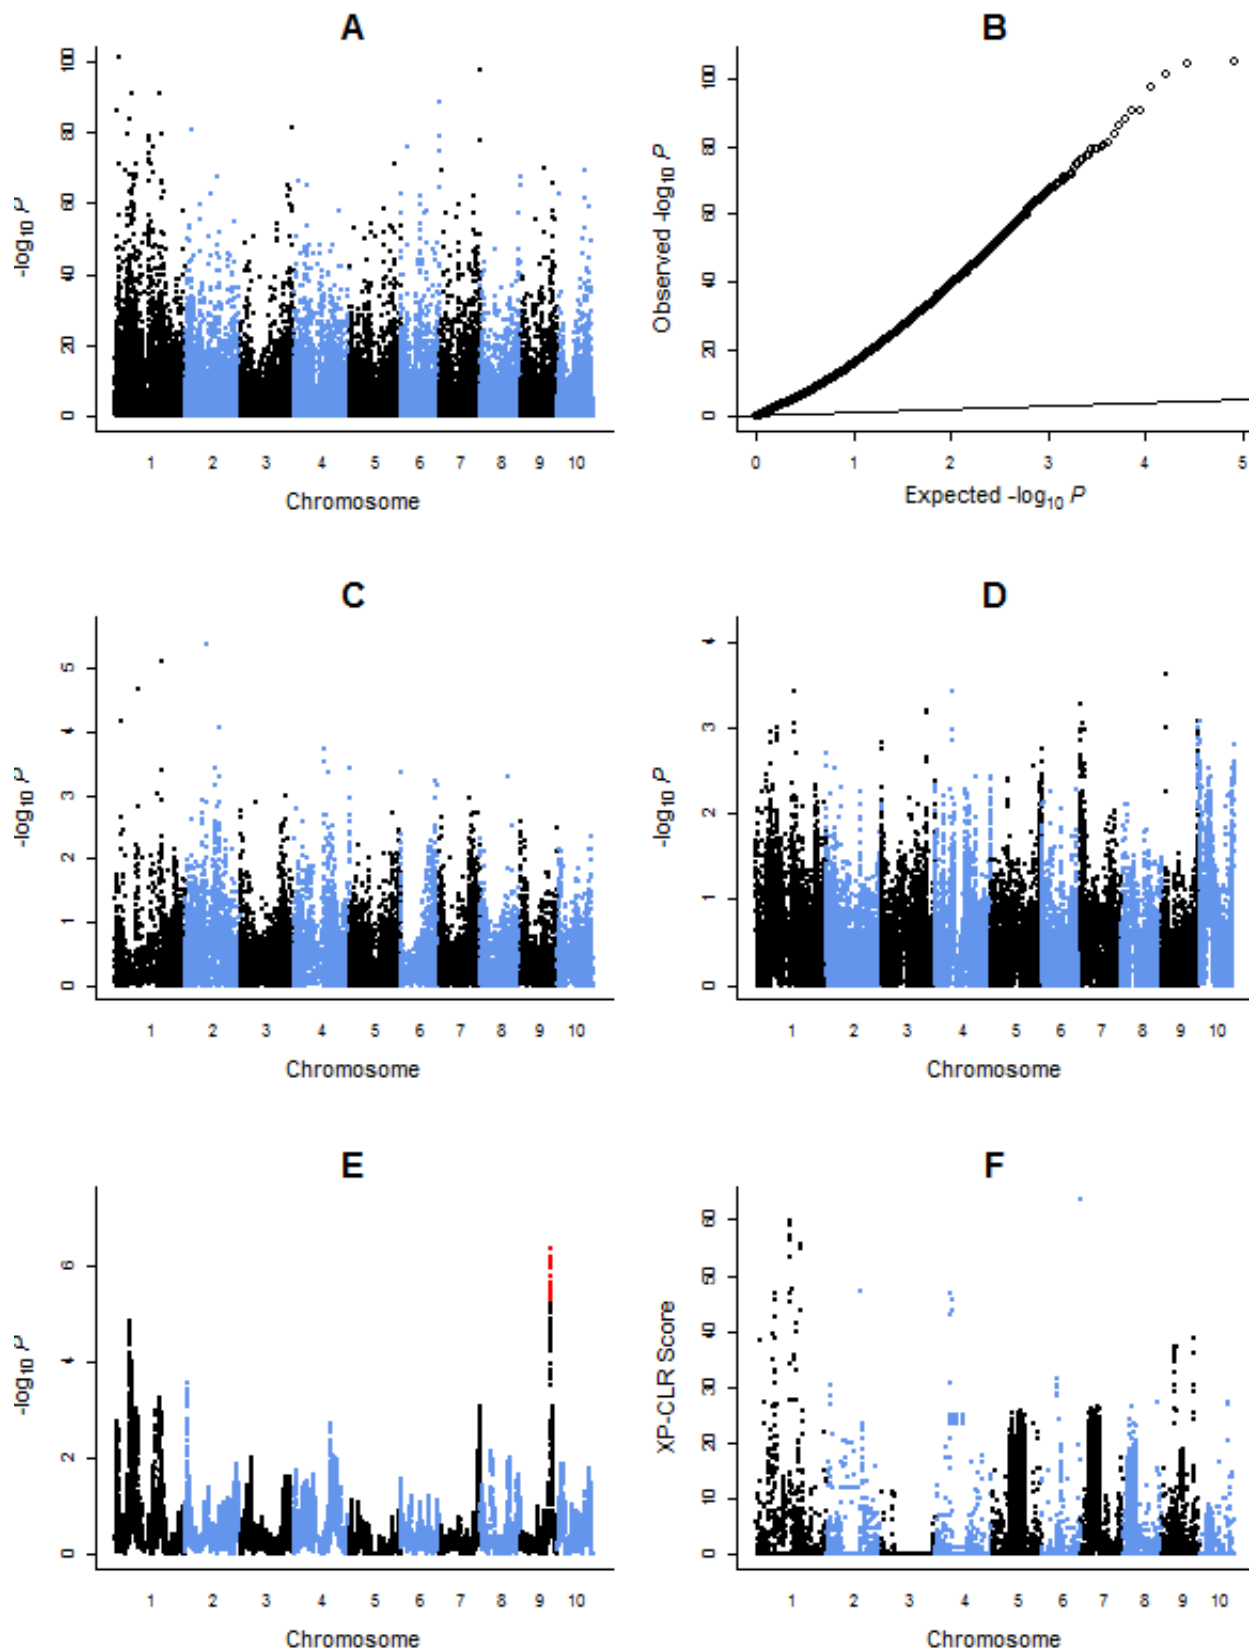

**Figure S3** Genome-wide scans for molecular markers or selective sweeps associated with *in vivo* haploid induction (HI). Case-control association analysis: (A) Manhattan plot, (B) Q-Q plot. Manhattan plot for selective sweeps with the (C) iHS score, (D) Rsb score, (E) hapFLK score and (F) XP-CLR score. For (A), (C), (D) and (E), P values are shown on a log<sub>10</sub> scale. P values were colored in red in (C), (D) and (E) if significant with FDR < 0.01.
