# Supplementary material for: The Genetic Basis of Haploid Induction in Maize Identified with a Novel Genome-Wide Association Method
Source: Oxford University Press journal article supplement (doi:10.1534/genetics.115.184234), 2016-02-19
Supplement: figures4.pdf [file figures4.pdf]

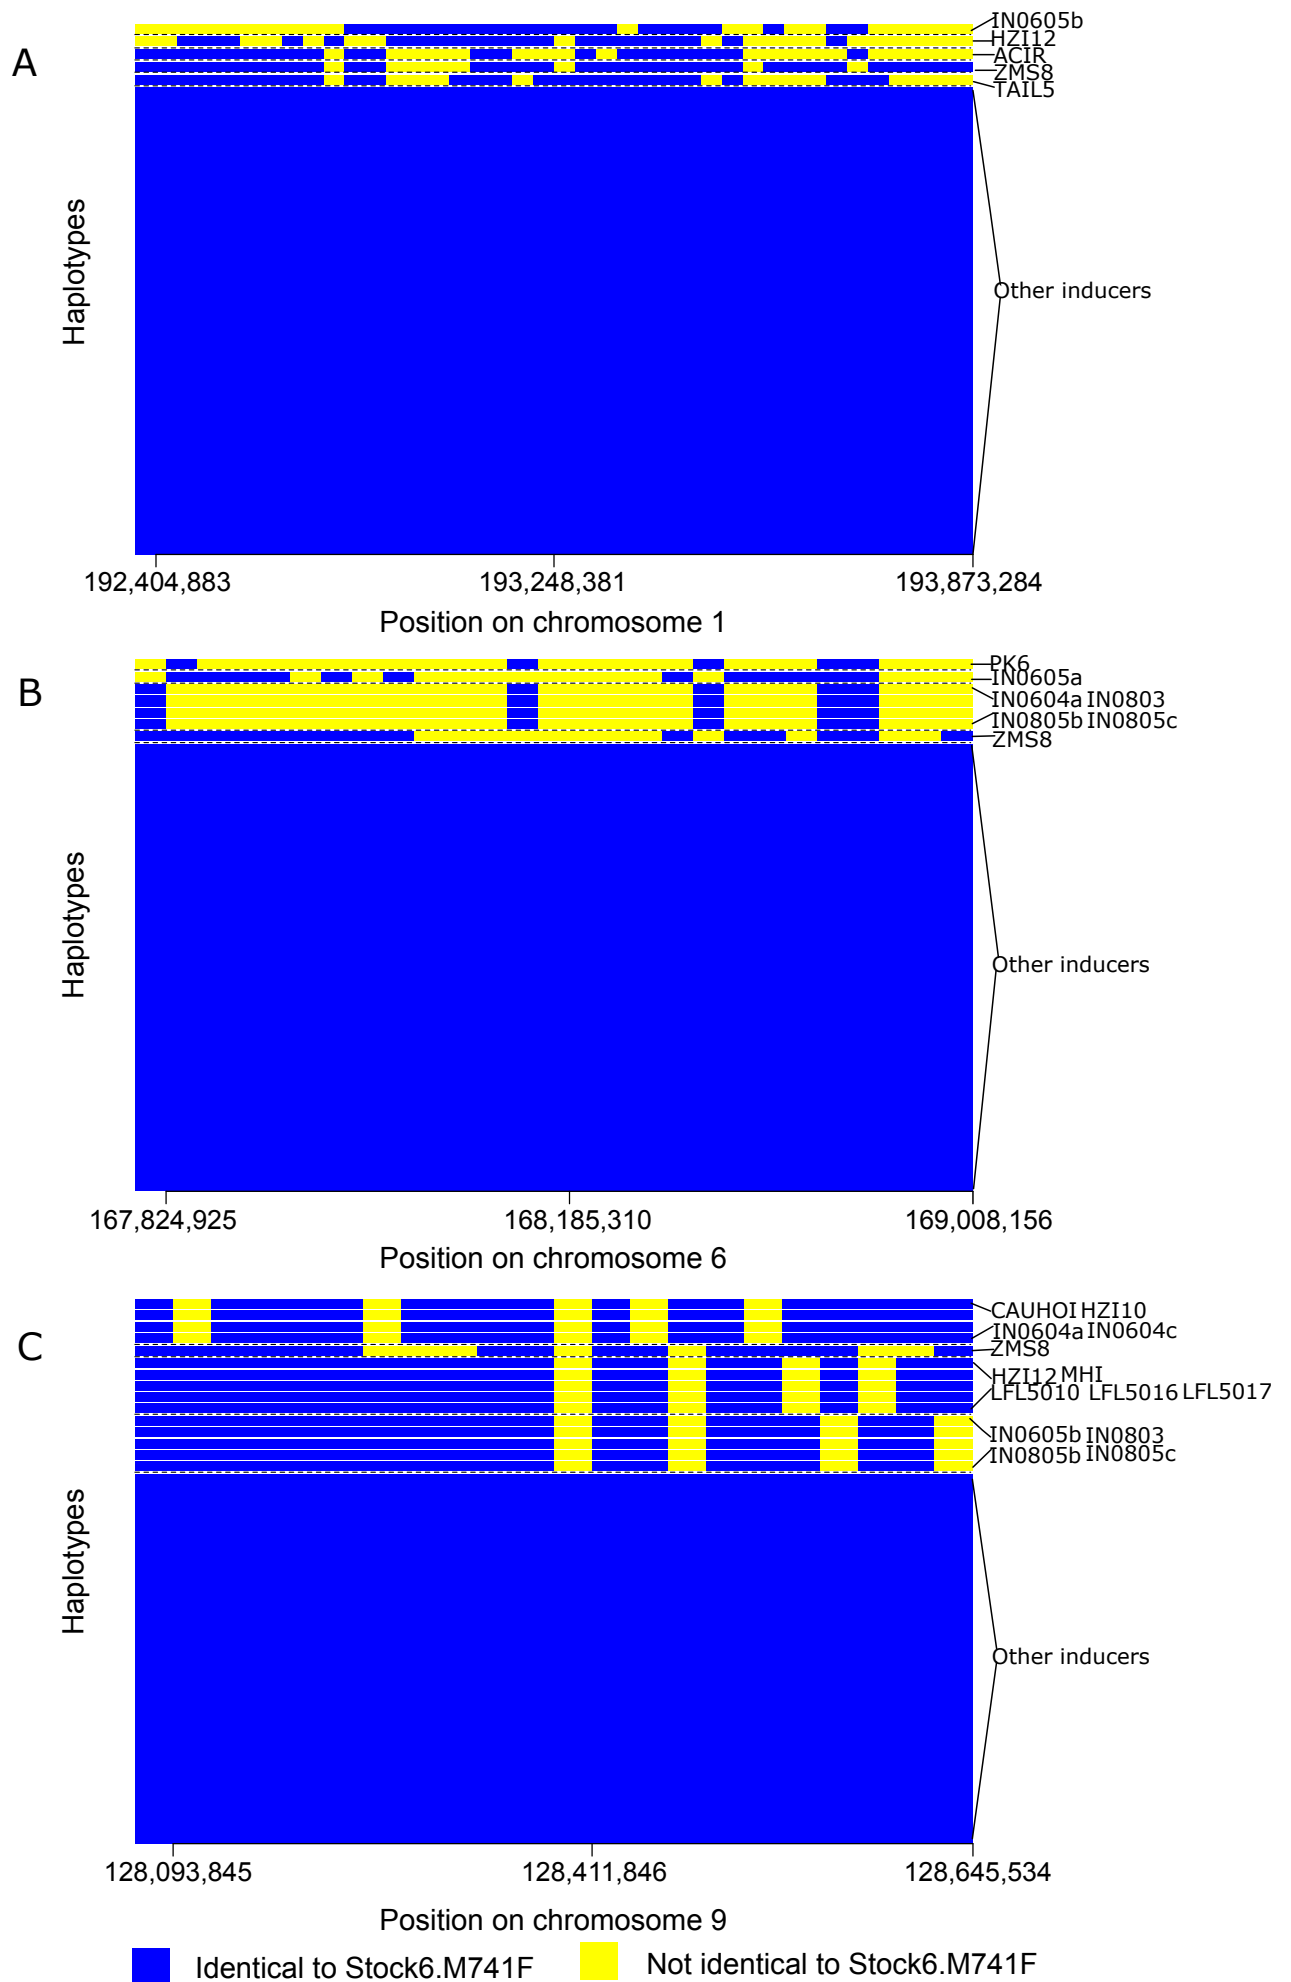

**Figure S4** Haplotypes of inducers in genomic regions with XP-CLR scores > 50 in (A) and (B) and with significant hapFLK scores in (C).
