# Supplementary material for: The Genetic Basis of Haploid Induction in Maize Identified with a Novel Genome-Wide Association Method
Source: Oxford University Press journal article supplement (doi:10.1534/genetics.115.184234), 2016-02-19
Supplement: figures5.pdf [file figures5.pdf]

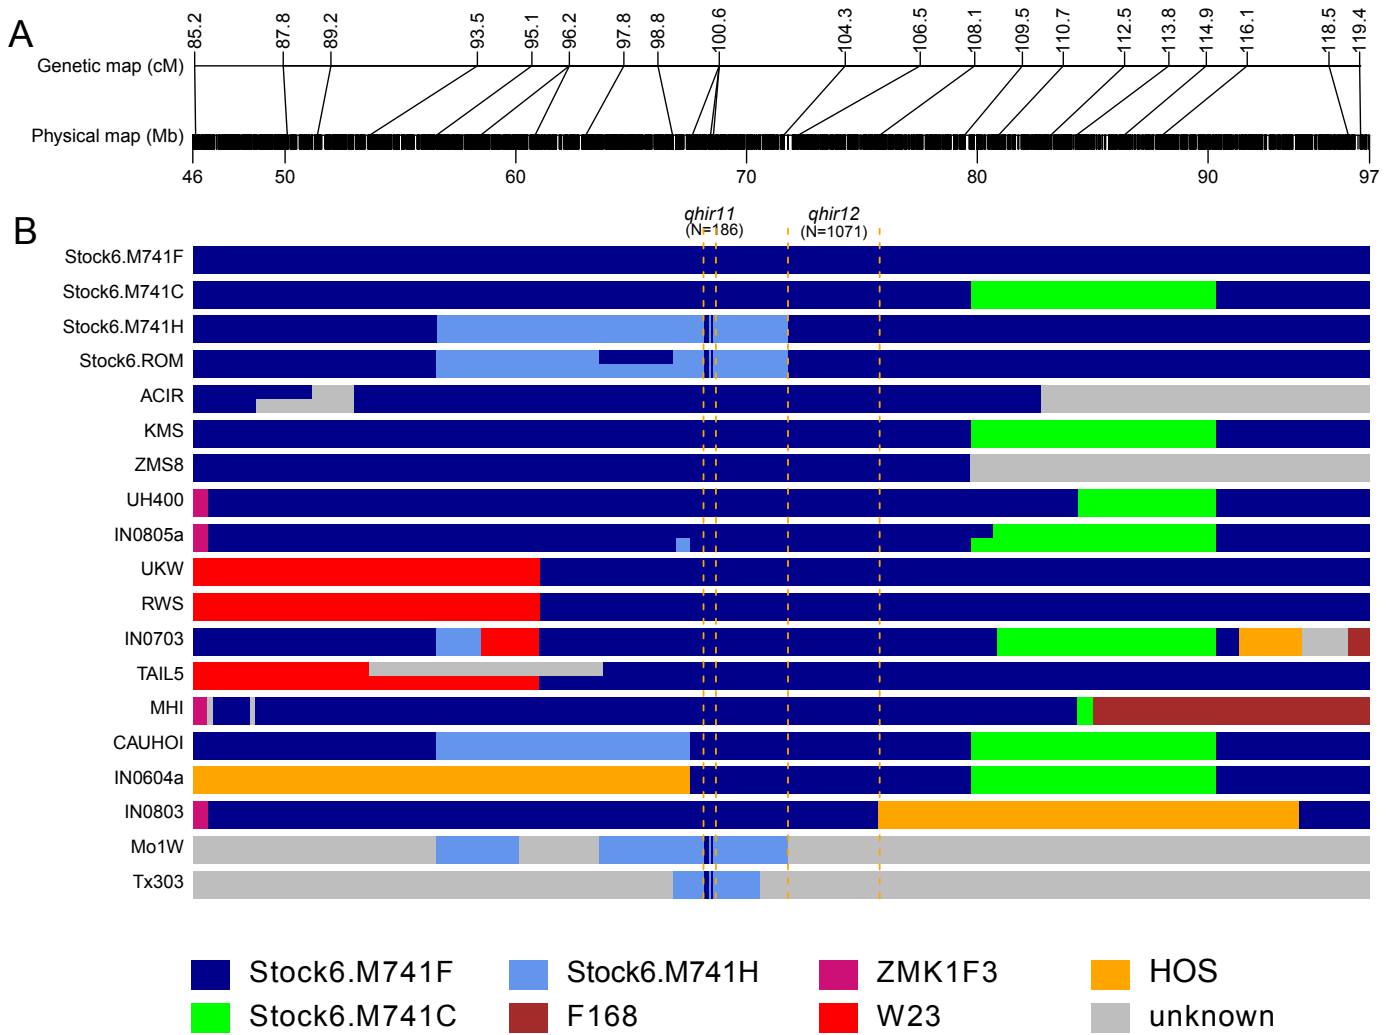

**Figure S5** Graphical genotypes of 17 maize haploid inducers and non-inducers of Mo1W and Tx303 in the combined support interval of QTL *qhir1* (*qhir1*-CSI) based on marker data of the 600k chip. (A) Physical and genetic maps. (B) Graphical genotypes indicating the origin of genomic fragments of inducers from their founders.
